# Supplementary material for: HIV serologically indeterminate individuals: Future HIV status and risk factors
Source: PubMed Central journal article supplement (PMC7449388; doi:10.1371/journal.pone.0237633), 2020-08-26

Supplemental figure 3. Future HIV EIA results for individuals with HIV negative results at their first visit

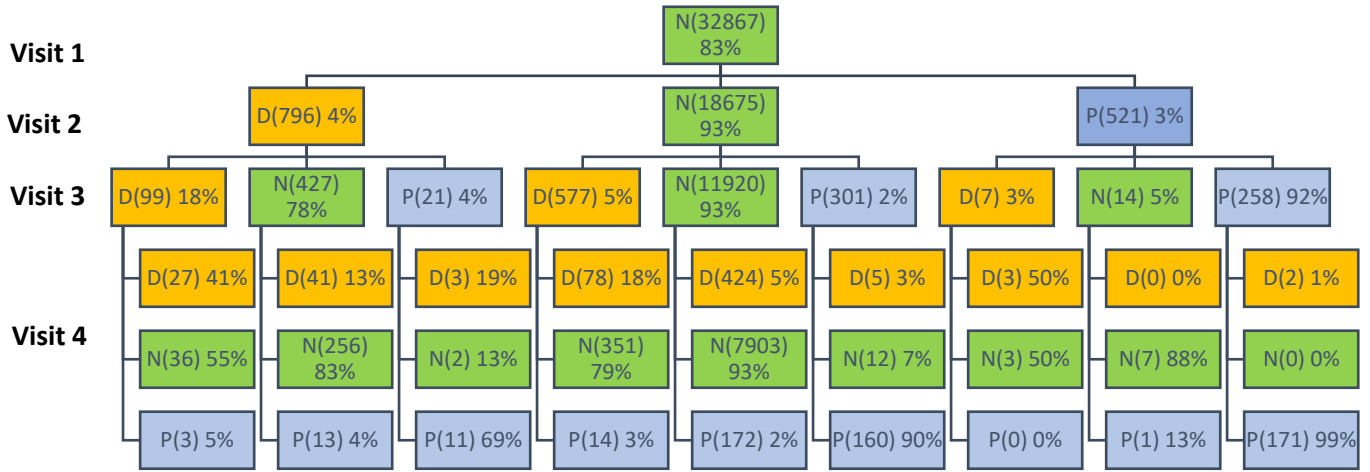

Supplement: pone.0237633.s003.pdf [file pone.0237633.s003.pdf]
