# Supplementary material for: HIV serologically indeterminate individuals: Future HIV status and risk factors
Source: PubMed Central journal article supplement (PMC7449388; doi:10.1371/journal.pone.0237633), 2020-08-26
Supplement: pone.0237633.s005.pdf [file pone.0237633.s005.pdf]

Supplemental figure 5. Prevalence of HIV EIA Indeterminate results for RCCS participants in Rakai, Uganda (1994-2009).

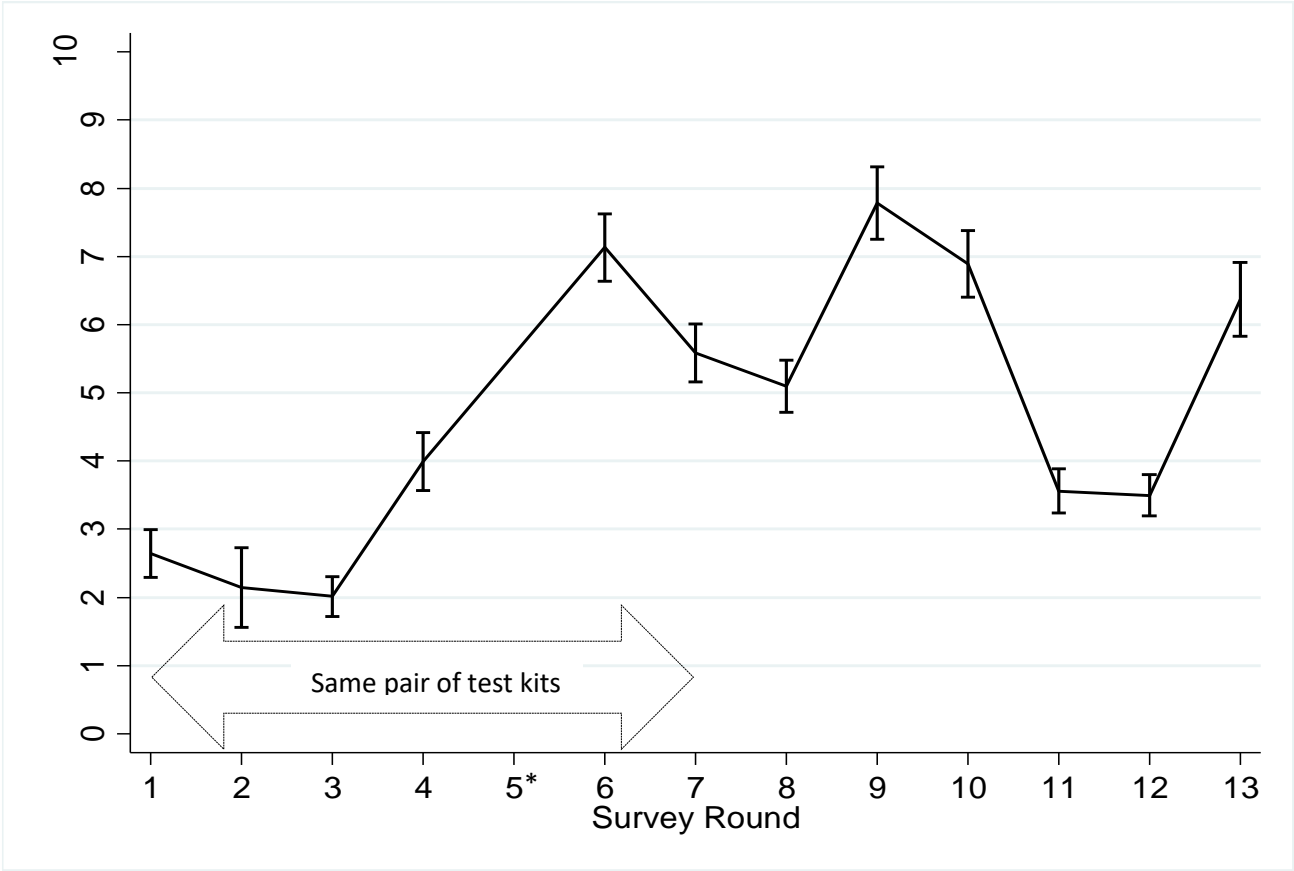

\*Survey round 5 was excluded from this analysis due to sample size restrictions
